# Supplementary material for: Retrotransposons Down- and Up-Regulation in Aging Somatic Tissues
Source: MDPI journal article supplement (doi:10.3390/cells11010079), 2021-12-28
Supplement: s1 [file s1]

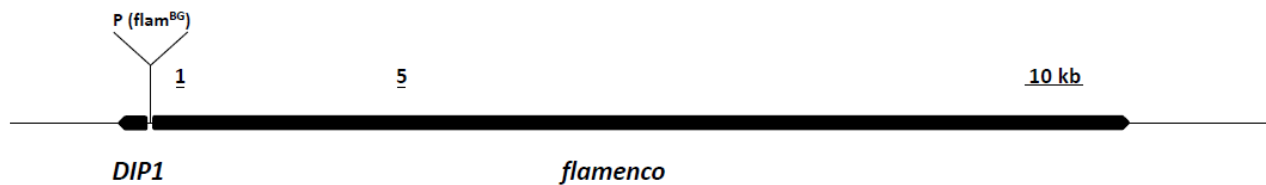

**Figure S1.** Schematic representation of the *flamenco* locus and the regions where the specific primer pairs map. Map of the *flamenco* gene showing the *DIP1* gene, the *flam*<sup>BG02658</sup> (*flam*<sup>BG</sup>) insertion at the 5' end of the *flamenco* locus, and the positions of primers used to analyze *flamenco* primary transcripts expression (1-flam1;5-flam5).

**Table S1.** Primer sequences used in this study.

| Primers for qPCR | Forward Primer              | Reverse Primer              |
|------------------|-----------------------------|-----------------------------|
| rp49             | 5' TCTGCATGAGCAGGACCTC 3'   | 5' ATCGGTTACGGATCGAACAA 3'  |
| gypsy            | 5' AGACGCTGCGACCATTAC 3'    | 5' CGTGCTGCCTCCAGAATGAT 3'  |
| flam1            | 5' TCAAAGCGATTCATTCCTCAG 3' | 5' CCATTTGGCTATGAGGATCAG 3' |
| flam5            | 5' CAGGCCCCCTATTGATTAGAT 3' | 5' TGCTCGGGCTTTCTTAAAGT 3'  |
| ZAM              | 5' TTCGCGTTAGGAGCCGTACT 3'  | 5' TTGACTTCGGTGTCGGAGAG 3'  |
| Idefix           | 5' GAATGATTCCGCTCTAGTGG 3'  | 5' ATGCGGTCTCTTTCTTCTGC 3'  |
